# Supplementary material
Source: PubMed Central journal article supplement (PMC1679663)

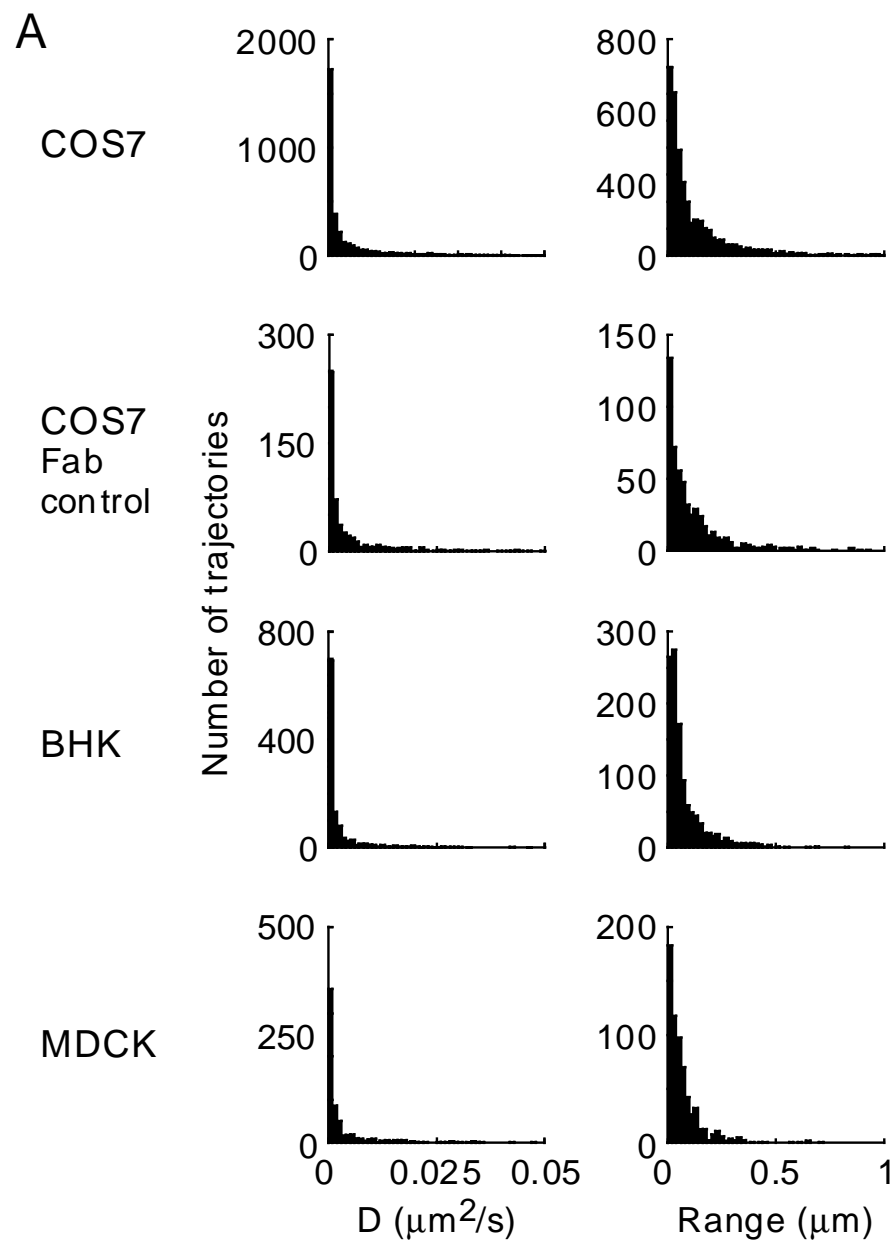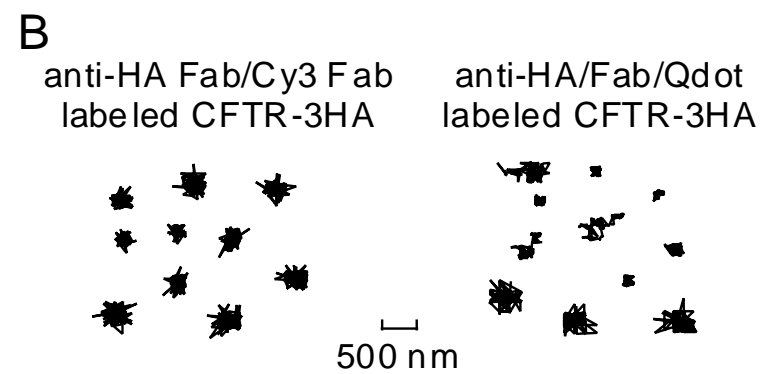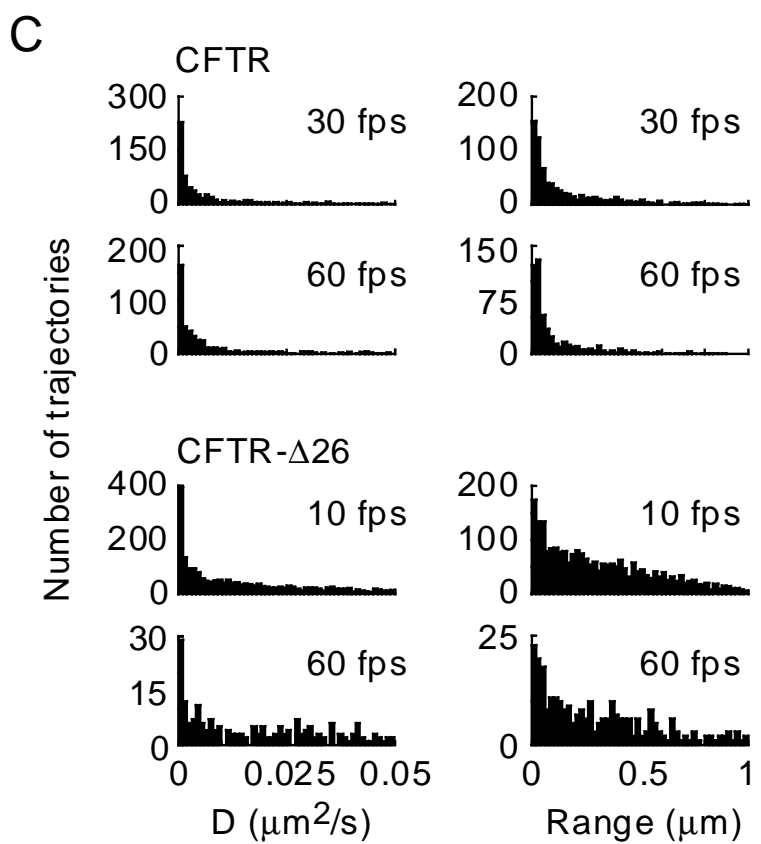

Supplementary Figure S1

Supplement: mbc_E06-08-0670_1.pdf [file mbc_E06-08-0670_1.pdf]
